# Supplementary material
Source: MDPI journal article supplement (https://www.mdpi.com/2073-4441/14/6/871)
Supplement: s1 [file s1]

## Supplementary materials (SM)

# Assessment of levonorgestrel in leaching of a landfill and their effects over placental cell line and sperm cells

Ramiro Ríos-Sossa <sup>1</sup>, Juan José García-Londoño <sup>1</sup>, Daniel Gil-Ramírez <sup>1</sup>, Arley Camilo Patiño <sup>2</sup>, Walter D. Cardona-Maya <sup>3</sup>, Juan Carlos Quintana-Castillo <sup>4</sup> and Jhon Fredy Narváez-Valderrama <sup>1,\*</sup>

<sup>1</sup> Grupo de Investigación Ingeniar, Facultad de Ciencias Básicas e Ingeniería, Corporación Universitaria Remington, Calle 51 No. 51-27, Medellín, 050010 Colombia; ramiro.rios@udea.edu.co (R.R.-S.); juan.garcia.3750@miremington.edu.co (J.J.G.-L.); danielh.gil@udea.edu.co (D.G.-R.)

<sup>2</sup> Grupo Toxicología, Alternativas Terapéuticas y Alimentarias BIOPOLIMER, Facultad de Ciencias Farmacéuticas y Alimentarias, Universidad de Antioquia, Calle 70 # 52-21, Medellín, 050010 Colombia; arley.patino@udea.edu.co

<sup>3</sup> Grupo Reproducción, Facultad de Medicina, Universidad de Antioquia, Calle 70 # 52-21, Medellín, 050010 Colombia; wdario.cardona@udea.edu.co

<sup>4</sup> Grupo de Investigación Infettare, Universidad Cooperativa de Colombia, Calle 50A 41-20, Medellín, 050012 Colombia; juan.quintanac@ucc.edu.co

\* Correspondence: jhon.narvaez@uniremington.edu.co

## SM1. Normal sperm values

**Table S1.** Normospermia values and Consolidated effect of leached LNG on sperm motility and viability.

| Progressive motility     |              |              |              |              |
|--------------------------|--------------|--------------|--------------|--------------|
|                          | 0 hr         | 1 hr         | 2 hr         | 3 hr         |
| Control                  | 66 (55–78)a  | 61.6 (48–75) | 62 (51–74)   | 58.8 (46–72) |
| Leached                  |              | 62.5 (53–74) | 63 (53–74)   | 59.8 (48–72) |
| LNG                      |              | 63.3 (50–75) | 62.8 (53–73) | 59 (48–71)   |
| Non-progressive motility |              |              |              |              |
| Control                  | 10.5 (6–14)  | 11.2 (8–16)  | 10.2 (7–18)  | 14.2 (8–21)  |
| Leached                  |              | 10.3 (5–15)  | 10.3 (5–17)  | 12.5 (5–19)  |
| LNG                      |              | 11.3 (5–17)  | 10.3 (4–17)  | 12.8 (4–21)  |
| Immotile sperm cells     |              |              |              |              |
| Control                  | 23.5 (16–33) | 27.2 (17–40) | 27.8 (18–41) | 27 (20–34)   |
| Leached                  |              | 27.5 (21–36) | 27 (21–36)   | 27.8 (21–35) |
| LNG                      |              | 25.5 (18–37) | 27 (20–36)   | 28.3 (21–36) |
| Viability                |              |              |              |              |
| Control                  | 85 (78–92)   | 84.6 (76–90) | 84 (75–90)   | 81.4 (74–88) |
| Leached                  |              | 84 (75–89)   | 83.3 (73–91) | 81.8 (73–88) |
| LNG                      |              | 83.3 (78–90) | 82 (75–89)   | 81 (73–87)   |

a: mean (Normal parameters in min and max ranges)

## SM2. MTT assay

**Description:** MTT Assay employ a MTT reagent used to determine mammalian cell viability. The redox potential in active mammalian cells reduces MTT to a strongly pigmented formazan

product. After solubilization, the absorbance of the formazan can be measured with a microplate absorbance reader.

**Assay:**

1. For adherent cells (BeWo), the medium was removed and this was replaced with 100  $\mu$ L of fresh culture medium.
2. Then 10  $\mu$ L of MTT solution (12 mM) was measured in each well (96-well dishes). Additionally, negative control using 10  $\mu$ L of the MTT solution into 100  $\mu$ L of medium was carry out.
3. The MTT assay was incubated at 37 °C, 5% CO<sub>2</sub> and 95% humidity for 4 hours.
4. During this time, the cell wells were monitored under the microscope to analyze the formation of formazan crystals, that is, when a purple precipitate is formed. Once the time, the solution was removed, trying to leave a 25  $\mu$ L remnant in each well.
5. Then, 50  $\mu$ L of DMSO was added to each well and those were mixed using a micropipette.
6. The assay was Incubated at 37 °C, 5% CO<sub>2</sub>, and 95% humidity for 10 minutes.
7. Finally, the plate was inserted into the microplate reader, shaken for 10 seconds and the absorbance (optical density-OD) was read at 540 nm.

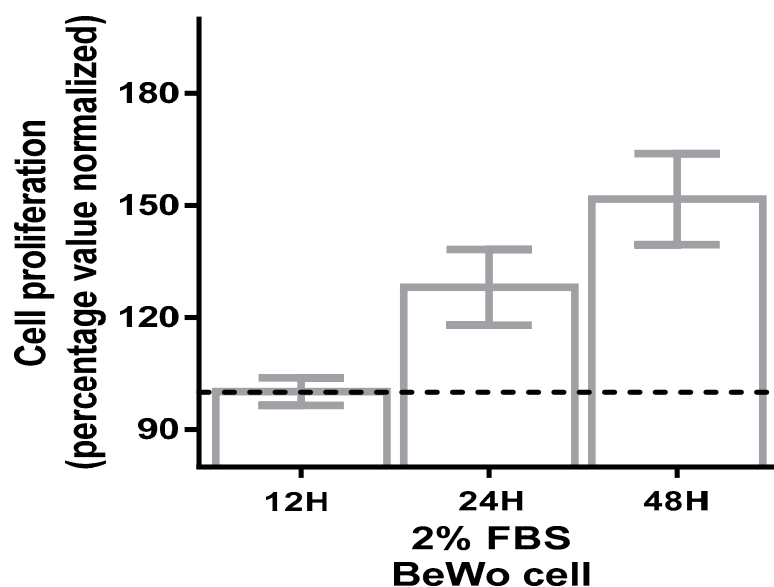

**Figure S1.** Results of BeWo cell proliferation.

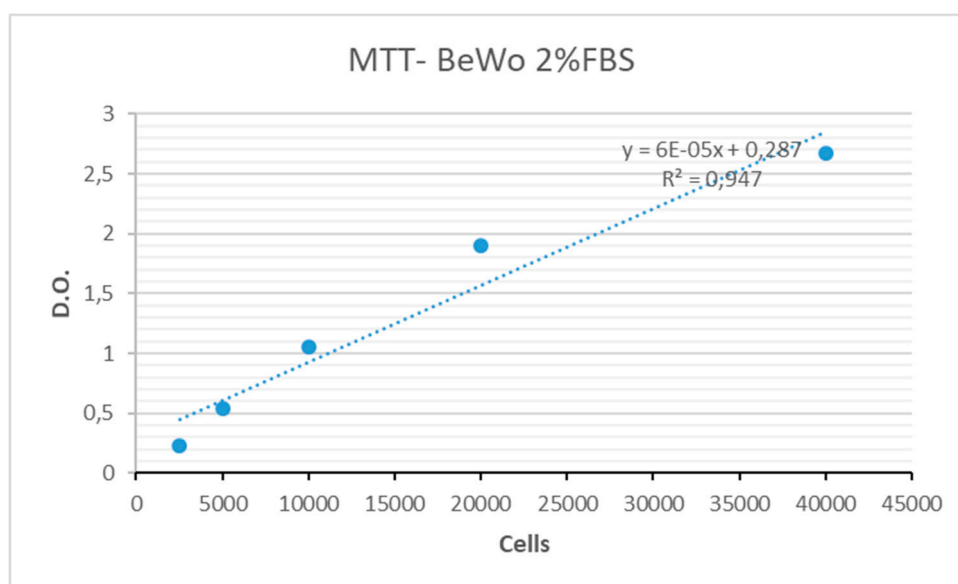

**Figure S2.** Result of curve calibration for cell viability and proliferation.

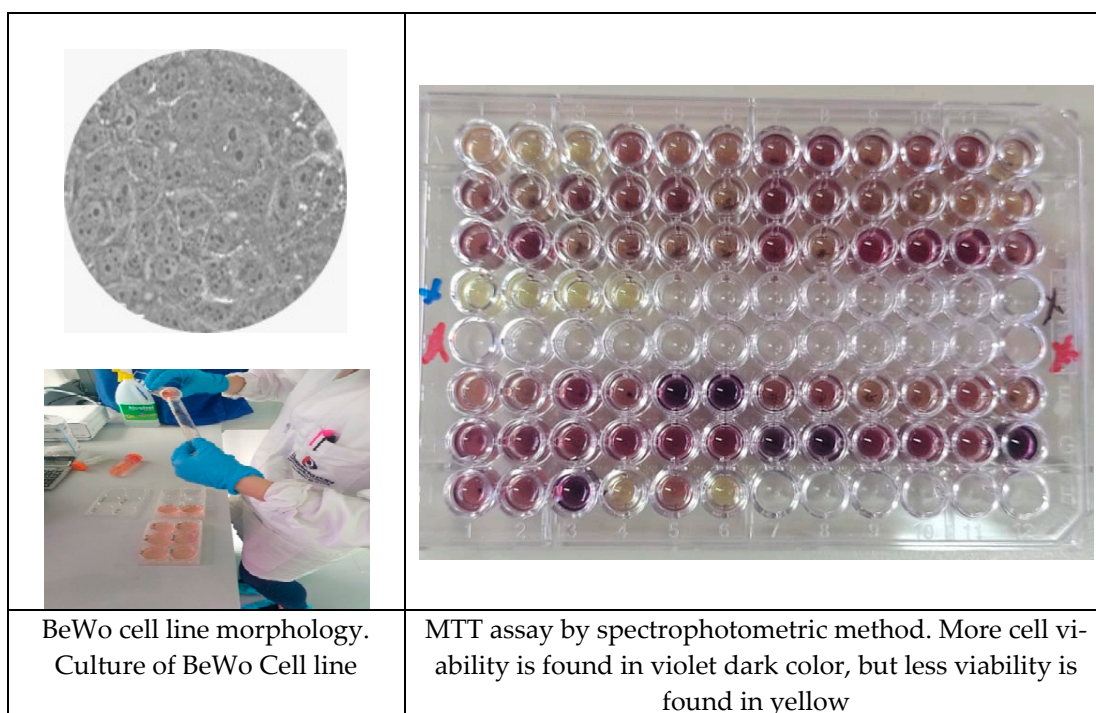

**Figure S3.** Laboratory analysis.

### SM3. UV spectrum of LNG

**Description:** To identify the LNG in samples the UV spectrum obtained by uHPLC-DAD during analysis was compared to this obtained in literature

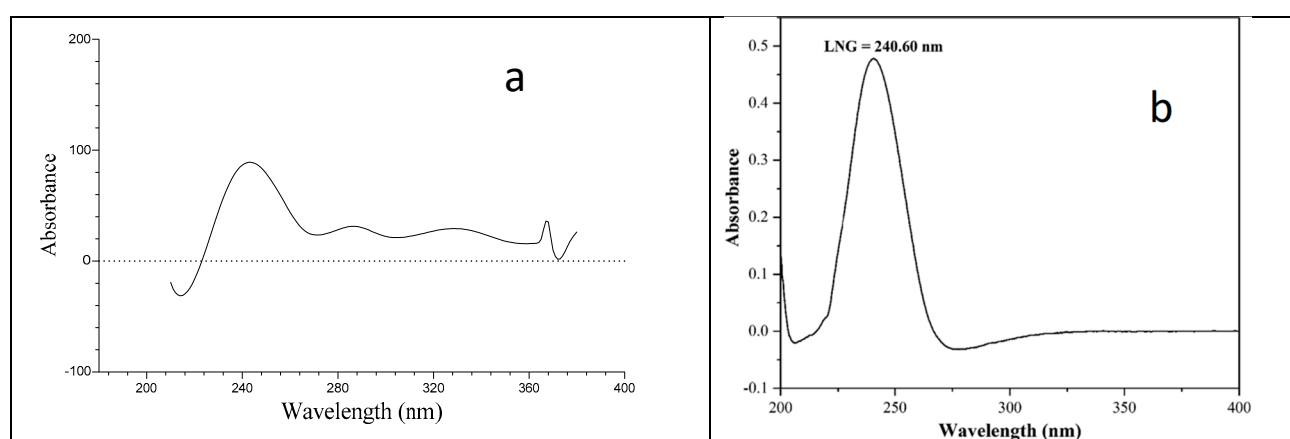

**Figure S4.** (a). UV spectrum of LNG by uHPLC. (b). UV spectrum of LNG (Literature). Both spectrum showed the maximum UV absorption in 240 nm.

### Linearity for LNG

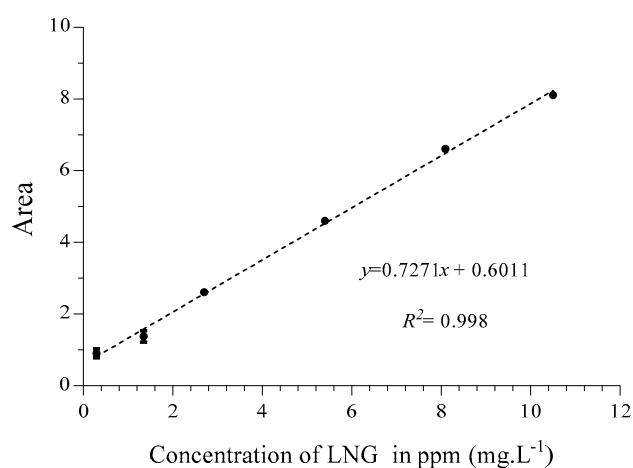

**Figure S5.** Linearity for LNG.  $n = 3$ . Linearity range between 0.3–10.5 ( $\mu\text{g L}^{-1}$ ).

### SM4. Analysis of PPCPs in the landfill



Influence of Buenavista landfill over Piedras river. This landfill shows a slope higher than 30% and thus rainfall and leaching processes may be done

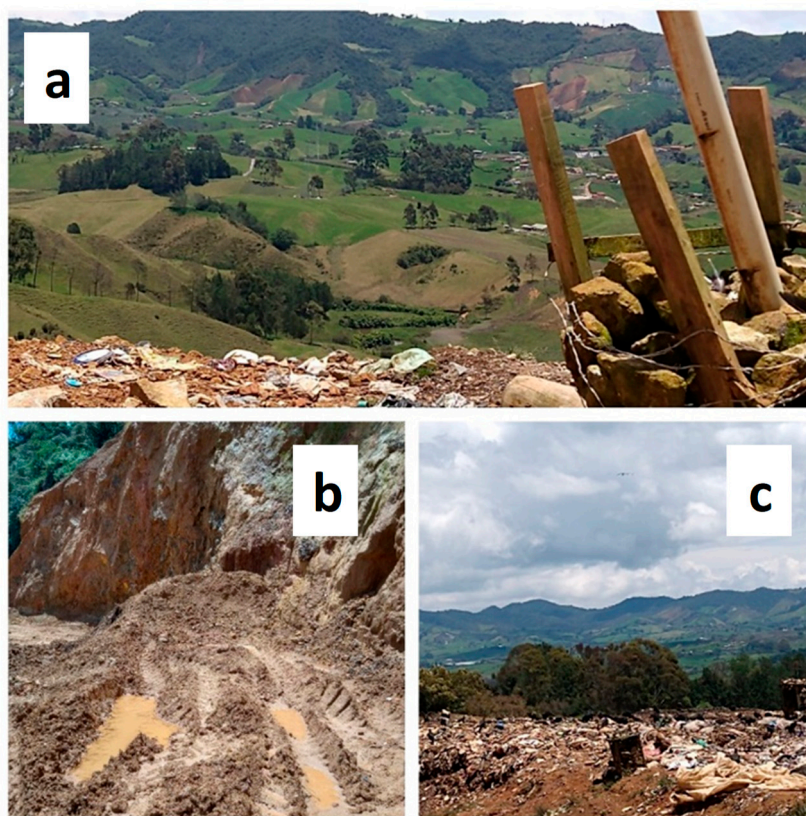

**Figure S6.** (a). Landfill Buenavista: slope steeper than 30% and is less than 600 m away from the Piedras River. (b). Cover material extraction for covering wastes in Buenavista Landfill. (c). Pharmaceutical blister residues in Buenavista landfill.

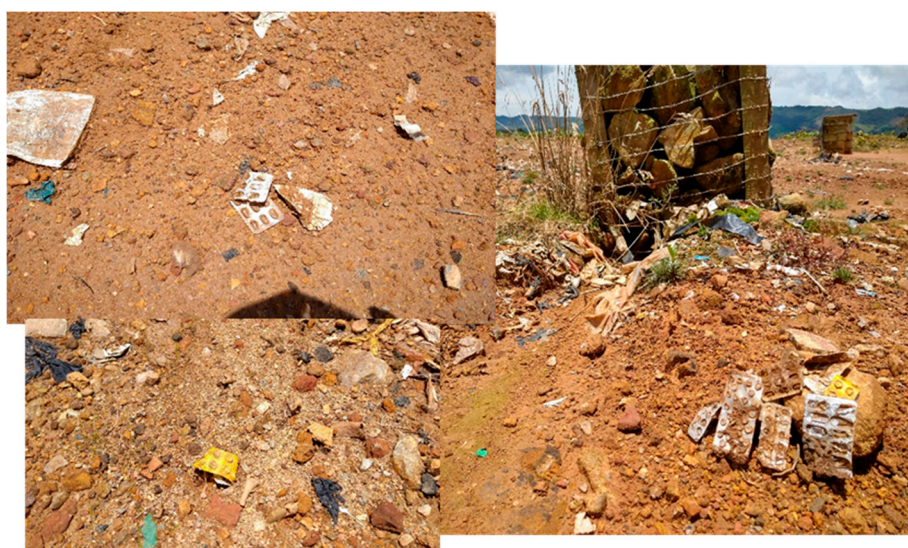

**Figure S7.** Many pharmaceutical blisters are found in Buenavista Landfill.

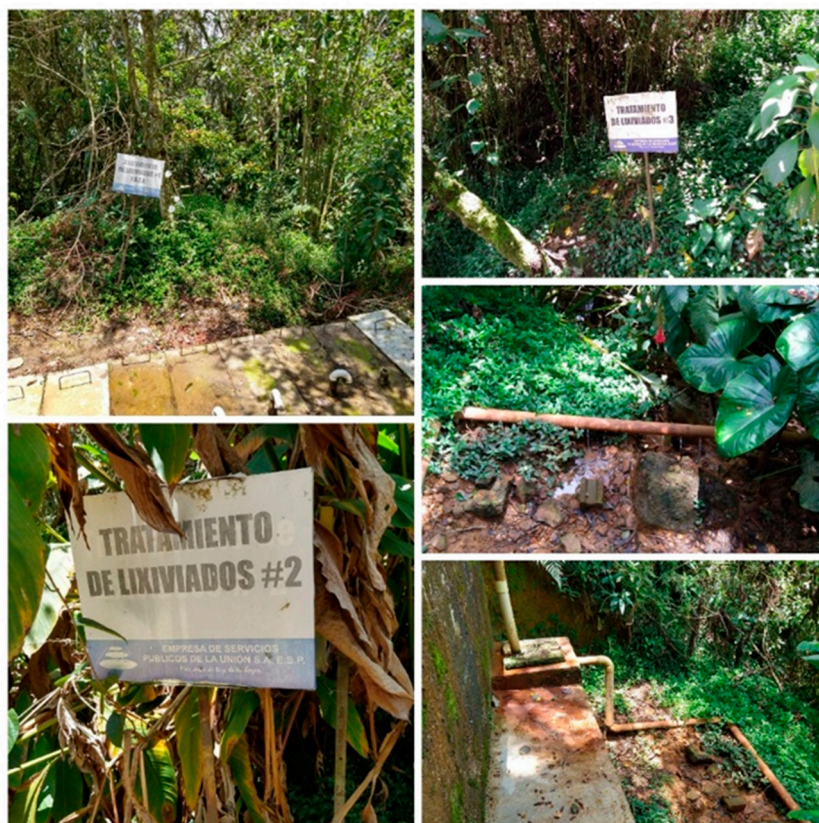

**Figure S8.** Anaerobic sludge blanket reactor (ASBR) from Buenavista landfill.
